# Supplementary material for: High graphite N content in nitrogen-doped graphene as an efficient metal-free catalyst for reduction of nitroarenes in water
Source: Royal Society of Chemistry journal article supplement (doi:10.1039/c6gc00222f), 2016-01-01

## **High Graphite N Content in Nitrogen-Doped Graphene as an Efficient Metal-free Catalyst for Reduction of Nitroarenes in Water**

Fan Yang,<sup>a†</sup> Cheng Chi,<sup>a†</sup> Chunxia Wang,<sup>b</sup> Ying Wang<sup>c\*</sup> and Yongfeng Li<sup>a\*</sup>

<sup>a</sup>State Key Laboratory of Heavy oil Processing, China University of Petroleum, Beijing Changping 102249, China

<sup>b</sup>Beijing National Laboratory for Molecular Sciences, Key Laboratory of Analytical Chemistry for Living Biosystems, Institute of Chemistry, the Chinese Academy of Sciences, Beijing 100190, China.  
E-mail: [yfli@cup.edu.cn](mailto:yfli@cup.edu.cn).

<sup>c</sup>State Key Laboratory of Rare Earth Resource Utilization, Changchun Institute of Applied Chemistry, Chinese Academy of Sciences, Changchun 130022, China.  
E-mail: [ywang\\_2012@ciac.ac.cn](mailto:ywang_2012@ciac.ac.cn).

<sup>†</sup>These authors contributed equally.

## 1. General Information

$^1\text{H}$  NMR spectra are recorded on JNM-LA300FT-NMR (300 MHz, 400 MHz) spectrometers.  $^1\text{H}$  NMR spectra are reported as follows: chemical shift in ppm ( $\delta$ ) relative to the chemical shifts of  $\text{CDCl}_3$  at 7.26 ppm and  $\text{CD}_3\text{OD}$  at 3.33 ppm, integration, multiplicities (s = singlet, d = doublet, t = triplet, q = quartet, m = multiplet and br = broadened), and coupling constants (Hz). Analytical thin-layer chromatography (TLC) was performed on 0.2 mm precoated plate Kieselgel 60 F254 (Merck).

## 2. Mechanism study for the reduction of nitroarenes

0.5 mmol p-nitrochlorobenzene (40 mg) was moved into a reactor together with 2 mg NG-1 and 1 ml water at room temperature. The mixture was stirred for 1-2 min for thoroughly mixing. 5 equiv. of  $\text{NaBH}_4$  (1.25 mmol/mL) 2mL was added dropwise into the above solution under magnetic stirring at room temperature. After reacting for 0.5 hour, the sample was dissolved in ethyl acetate and analyzed by GC-MS. The initial temperature of the column was 70 °C held for 1 min and was programmed to 300 °C at 15 °C/min, then held for 15 min at 300 °C, the sample injection volume was 2  $\mu\text{L}$ . Helium was used as carrier gas at a flow rate of 1.1 mL/min on split mode (1:50).

## 3. Computational details

All the electronic structure and energy calculations were carried out by the spin-polarized density functional theory (DFT) using the Vienna ab initio simulation package (VASP).<sup>1-4</sup> PAW potentials were used to describe ion cores and valence electrons interactions.<sup>5,6</sup> The adopted exchange-correlation functional is the generalized gradient approximation (GGA) with the Perdew-Burke-Ernzerhof.<sup>7</sup> A kinetic energy cut off of 350 eV was used with a plane-wave basis set. The integration of the Brillouin zone was conducted using a  $5\times 5\times 1$  Monkhorst-Pack grid.<sup>8</sup> All atoms were fully relaxed and optimized until the force was converged to 0.05 eV/Å and the total energy was converged to  $1.0\times 10^{-5}$  eV/atom.

Four kinds of nitrogen doped graphene (NG), graphitic N, pyridinic N, pyrrolic N, and pyridinic N oxidized, were established based on the  $4\times 4$  single layer graphene, armchair and zigzag ribbons. The structures were designed according to previous reference.<sup>9</sup> The periodical graphene slab  $9.86\text{ Å}\times 8.60\text{ Å}$  in size was used. The edge graphene ribbon was prepared with the size of  $20\text{ Å}\times 8.60\text{ Å}$ . To avoid the image

interactions sufficiently large vacuum of 15.0 Å has been taken along the z-axis.

The adsorption energy ( $E_{\text{ads}}$ ) of nitrobenzene was defined as follows:

$$E_{\text{ads}} = E_{\text{substrate+nitrobenzene}} - E_{\text{nitrobenzene}} - E_{\text{substrate}} \quad (1)$$

where  $E_{\text{substrate+nitrobenzene}}$ ,  $E_{\text{nitrobenzene}}$ , and  $E_{\text{substrate}}$  are corresponding to the total energies of a nitrobenzene molecule and four NG substrates, a gas phase nitrobenzene, and an isolated substrate, respectively. A negative value indicates an exothermic chemisorption.

#### 4. The GC-MS spectra of reduction reaction intermediate products

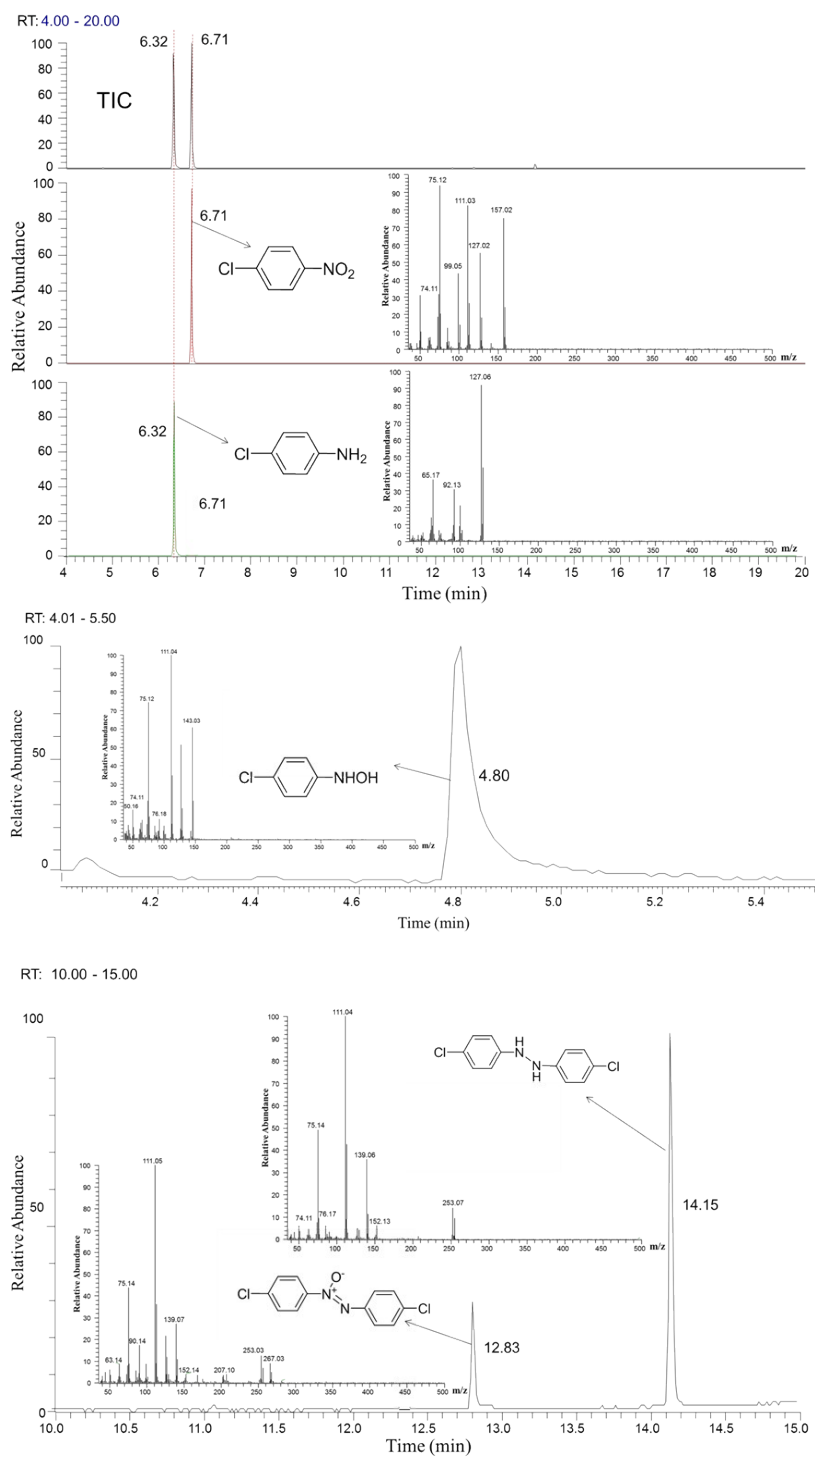

Fig. S1 The GC-MS spectra of reduction reaction intermediate products.

## 5. A proposed reaction mechanism for NG catalyze reduction of nitroarene

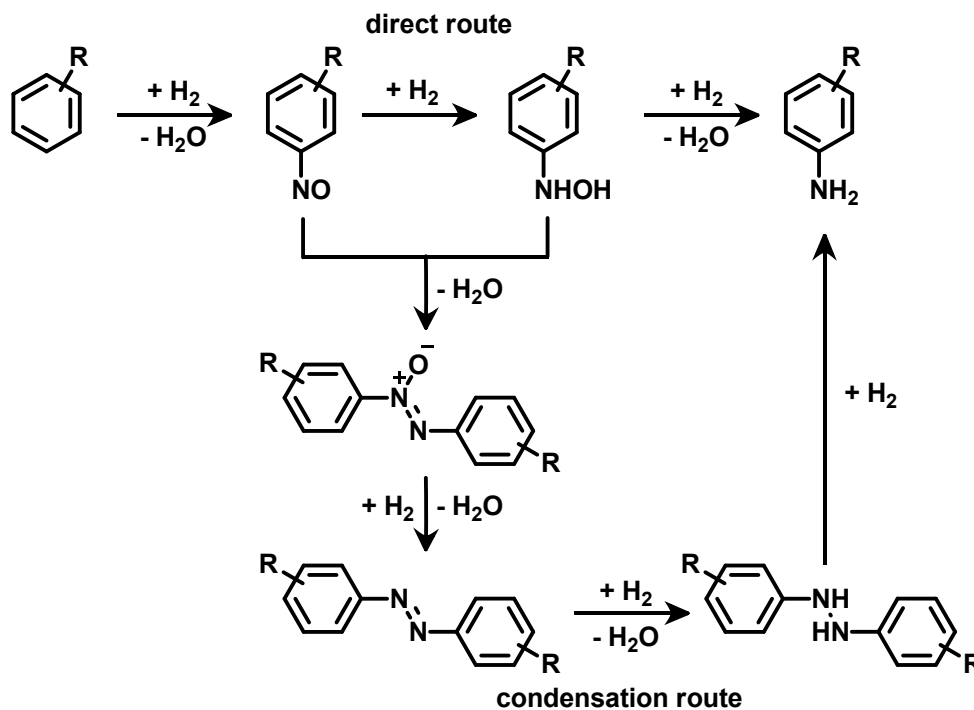

Fig. S2 Schematic of the proposed reaction pathway for nitroarenes reduction

## 6. Spectroscopic data of the products:

### Aniline hydrochloride (Table 3, entry 1)<sup>10</sup>

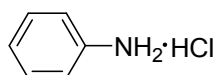

<sup>1</sup>H NMR (400 MHz, CD<sub>3</sub>OD)  $\delta$  7.57-7.52 (m, 3H), 7.44 (d,  $J$  = 8.8 Hz, 2H).

### 4-Chloroaniline (Table 3, entry 2)<sup>11</sup>

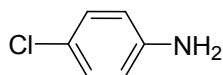

<sup>1</sup>H NMR (400 MHz, CDCl<sub>3</sub>)  $\delta$  7.10 (d,  $J$  = 8.4 Hz, 2H), 6.33 (d,  $J$  = 8.4 Hz, 2H), 3.66 (s, 2H).

### 4-Bromoaniline hydrochloride (Table 3, entry 3)<sup>10</sup>

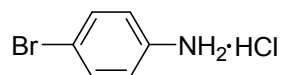

$^1\text{H}$  NMR (300 MHz,  $\text{CD}_3\text{OD}$ )  $\delta$  7.74 (d,  $J = 8.7$  Hz, 2H), 7.36 (d,  $J = 8.7$  Hz, 2H).

**4-Iodoaniline hydrochloride (Table 3, entry 4)<sup>10</sup>**

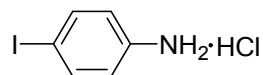

$^1\text{H}$  NMR (300 MHz,  $\text{CD}_3\text{OD}$ )  $\delta$  7.91 (d,  $J = 8.7$  Hz, 2H), 7.20 (d,  $J = 8.7$  Hz, 2H).

**4-Methylaniline hydrochloride (Table 3, entry 5)**

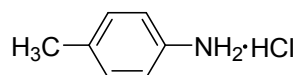

$^1\text{H}$  NMR (300 MHz,  $\text{CD}_3\text{OD}$ )  $\delta$  7.38 (d,  $J = 8.4$  Hz, 2H), 7.29 (d,  $J = 8.4$  Hz, 2H), 2.41 (s, 3H).

**4-Nitroaniline (Table 3, entry 6)<sup>11</sup>**

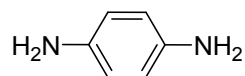

$^1\text{H}$  NMR (400 MHz,  $\text{CDCl}_3$ )  $\delta$  6.57 (s, 4H), 3.31 (s, 4H).

**4-Aminophenol hydrochloride (Table 3, entry 7)**

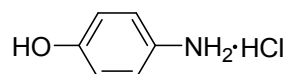

$^1\text{H}$  NMR (300 MHz,  $\text{CD}_3\text{OD}$ )  $\delta$  7.24 (d, 2H), 6.92 (d,  $J = 8.7$  Hz, 2H).

**4-Methoxyaniline hydrochloride (Table 3, entry 8)**

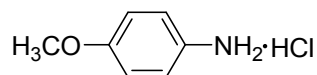

$^1\text{H}$  NMR (300 MHz,  $\text{CD}_3\text{OD}$ )  $\delta$  7.38 (d,  $J = 8.4$  Hz, 2H), 7.13 (d,  $J = 8.4$  Hz, 2H), 3.79 (s, 3H).

**4-Amino-benzoic acid hydrochloride (Table 3, entry 9)**

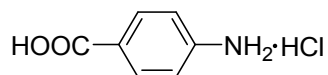

$^1\text{H}$  NMR (300 MHz,  $\text{CD}_3\text{OD}$ )  $\delta$  8.16 (d,  $J$  = 8.7 Hz, 2H), 7.48 (m,  $J$  = 8.7 Hz, 2H).

#### 4-Aminobenzonitrile (Table 3, entry 10)

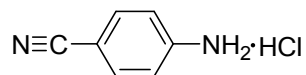

$^1\text{H}$  NMR (400 MHz,  $\text{CD}_3\text{OD}$ )  $\delta$  7.76 (d,  $J$  = 8.8 Hz, 2H), 7.30 (d,  $J$  = 8.8 Hz, 2H).

## References

- (1) G. Kresse and J. Furthmuller, *Comp. Mater. Sci.*, 1996, **6**, 15–50.
- (2) G. Kresse and J. Hafner, *Phys. Rev. B*, 1993, **47**, 558–561.
- (3) G. Kresse and J. Hafner, *Phys. Rev. B*, 1994, **49**, 14251–14269.
- (4) G. Kresse and J. Furthmuller, *Phys. Rev. B*, 1996, **54**, 11169–11186.
- (5) P. E. Blochl, *Phys. Rev. B*, 1994, **50**, 17953–17979.
- (6) G. Kresse, D. Joubert, *Phys. Rev. B*, 1999, **59**, 1758–1775.
- (7) J. P. Perdew, K. Burke and M. Ernzerhof, *Phys. Rev. Lett.*, 1996, **77**, 3865–3868.
- (8) H. J. Monkhorst and J. D. Pack, *Phys. Rev. B*, 1976, **13**, 5188–5192.
- (9) W. Liang, J. Chen, Y. Liu and S. Chen, *ACS Catalysis*, 2014, **4**, 4170–4177.
- (10) R. G. de Noronha, C. C. Romão and A. C. Fernandes, *J. Org. Chem.*, 2009, **74**, 960–964.
- (11) D. Cantillo, M. M. Moghaddam and C. O. Kappe, *J. Org. Chem.*, 2013, **78**, 4530–4542.

### 3. $^1\text{H}$ NMR charts of the products:

#### Aniline hydrochloride (Table 3, entry 1):

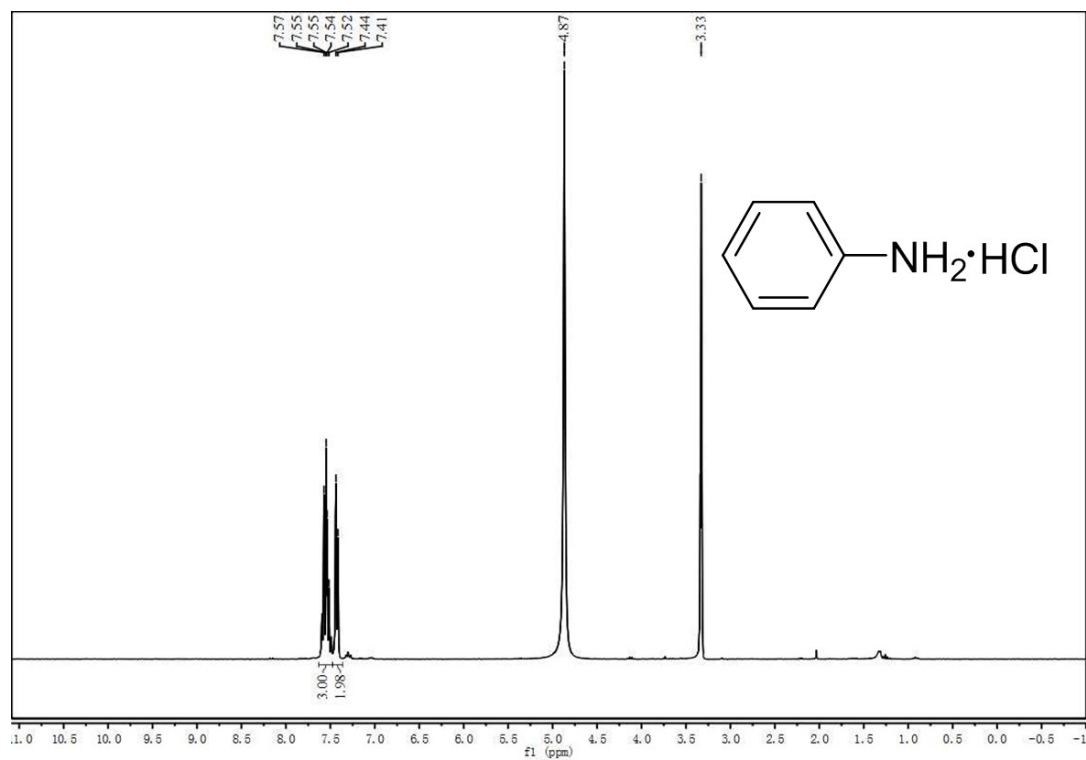

#### 4-Chloroaniline (Table 3, entry 2):



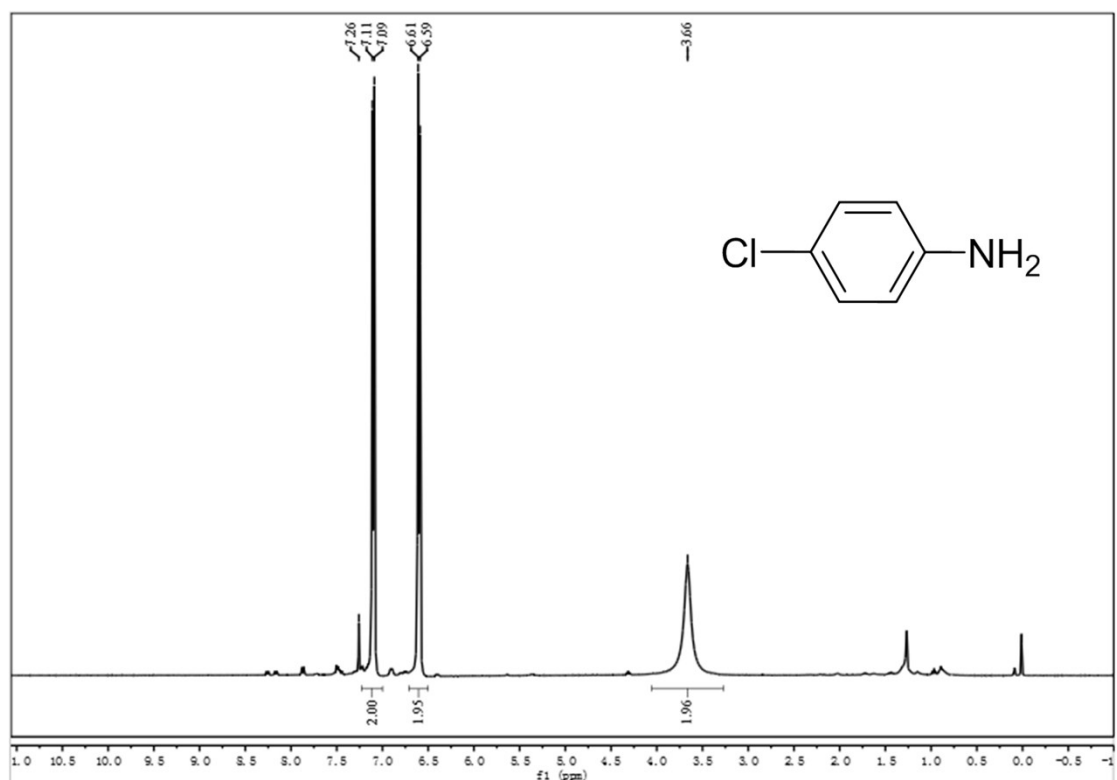

**4-Bromoaniline hydrochloride (Table 3, entry 3):**

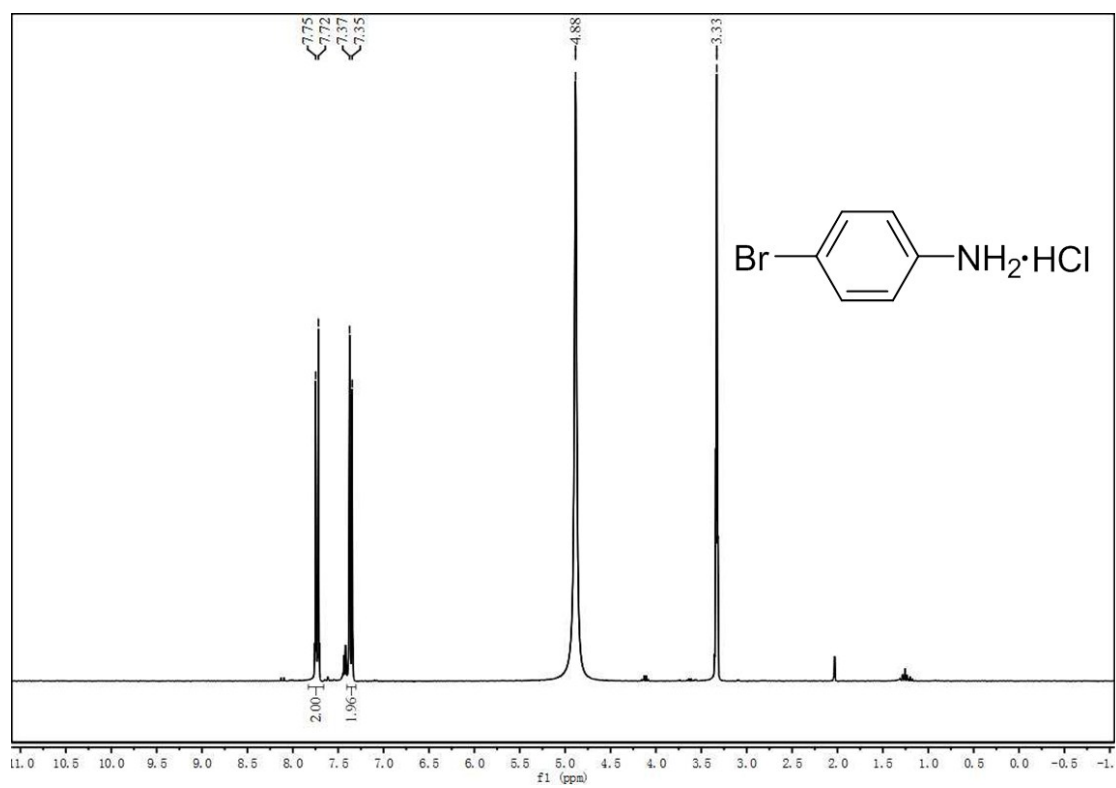

**4-Iodoaniline hydrochloride (Table 3, entry 4)**

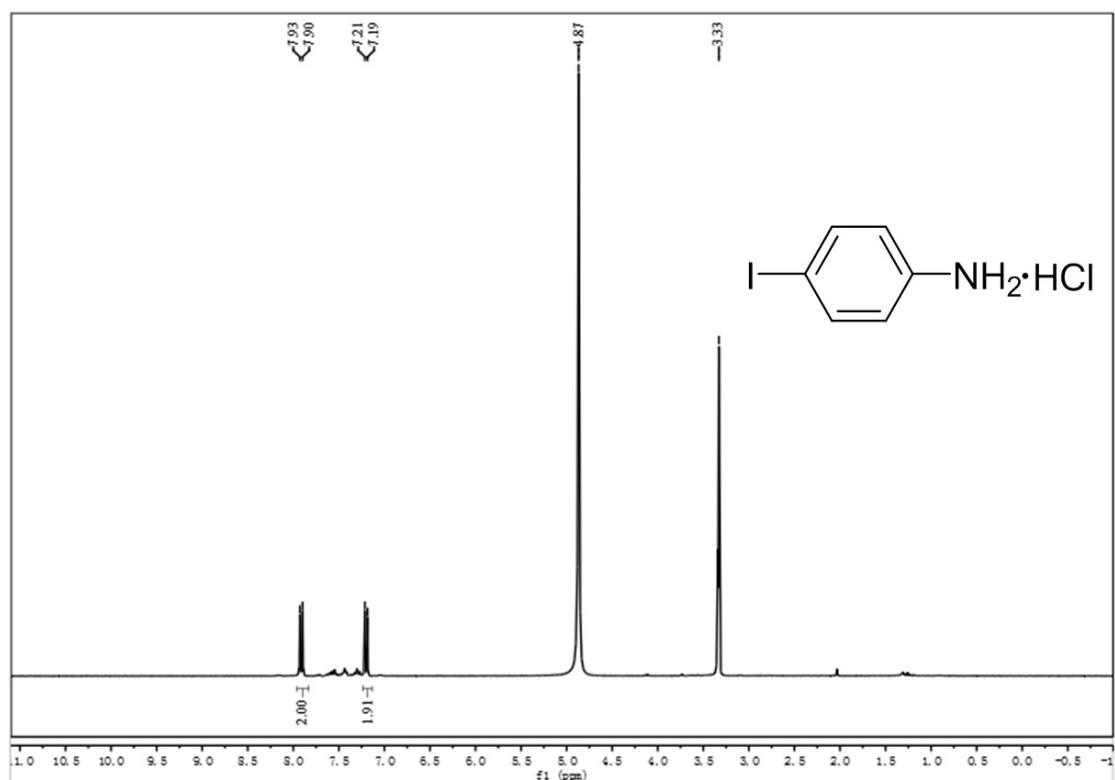

**4-Methylaniline hydrochloride (Table 3, entry 5)**

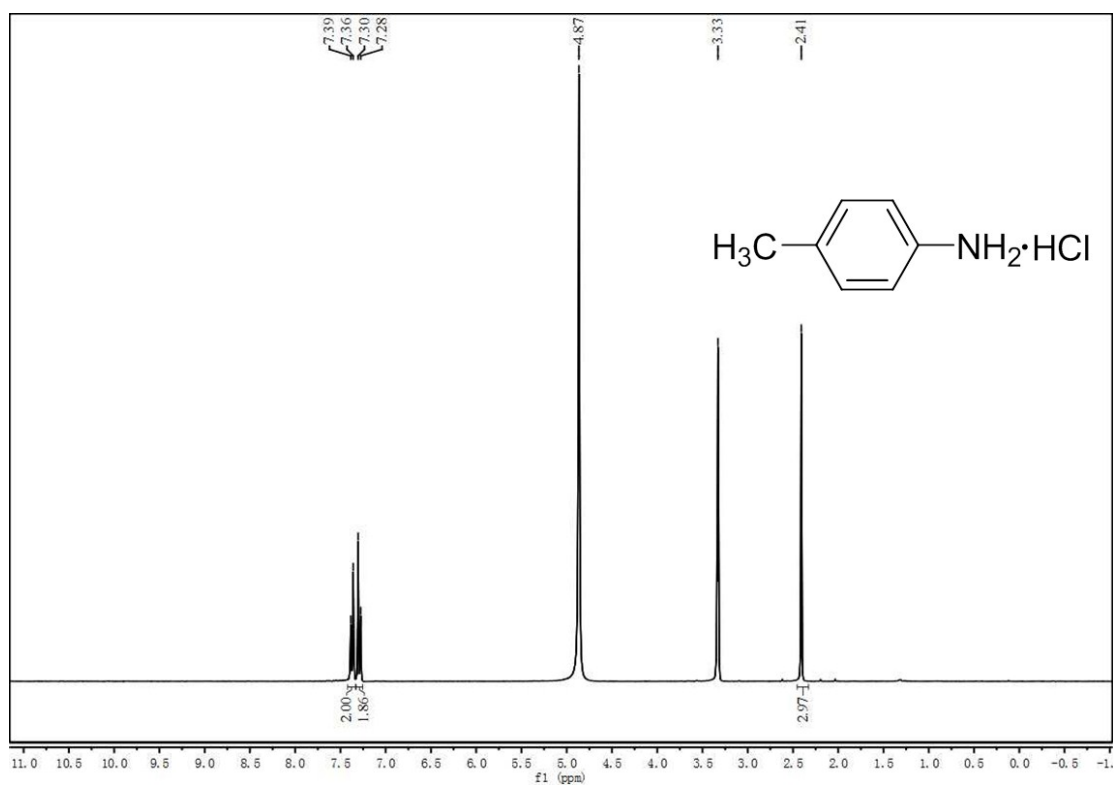

**4-Nitroaniline (Table 3, entry 6)**

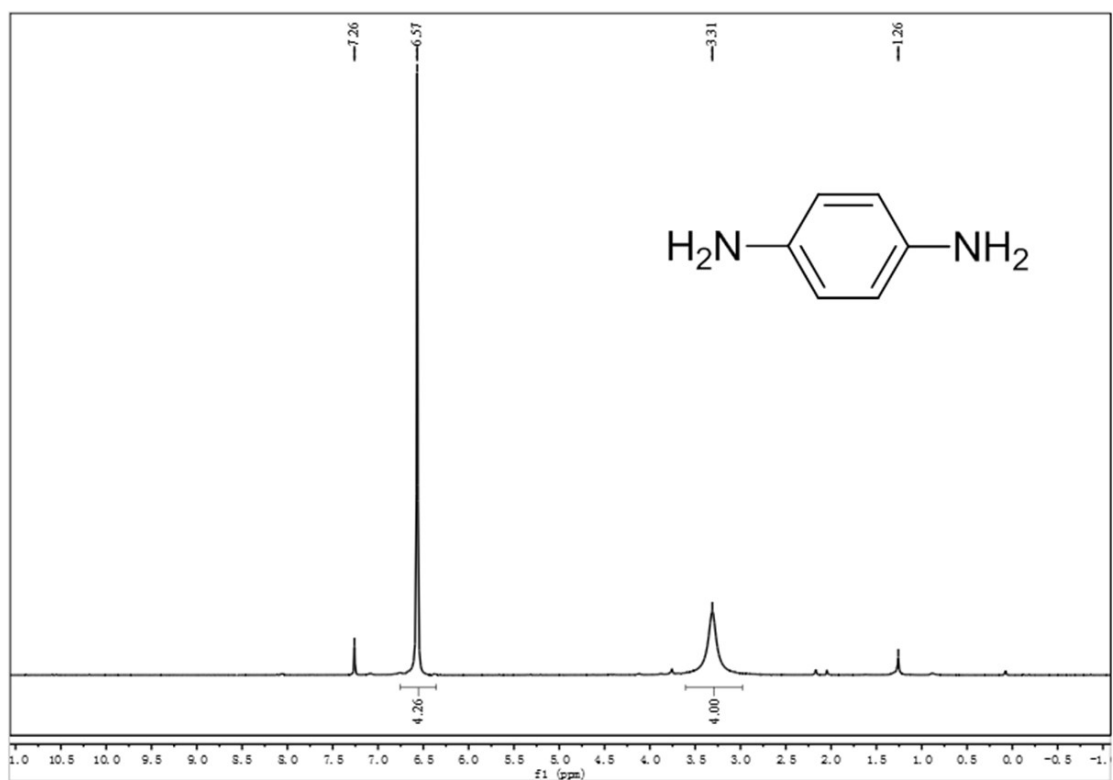

**4-Aminophenol hydrochloride (Table 3, entry 7)**

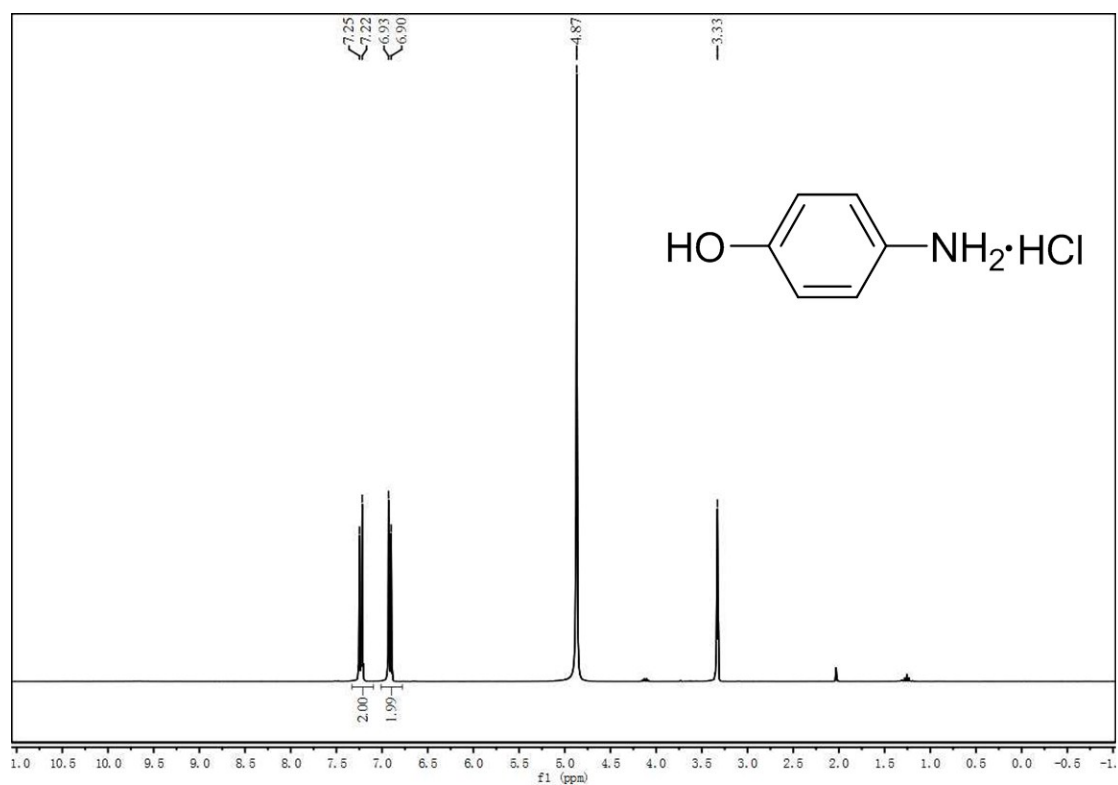

**4-Methoxyaniline hydrochloride (Table 3, entry 8)**

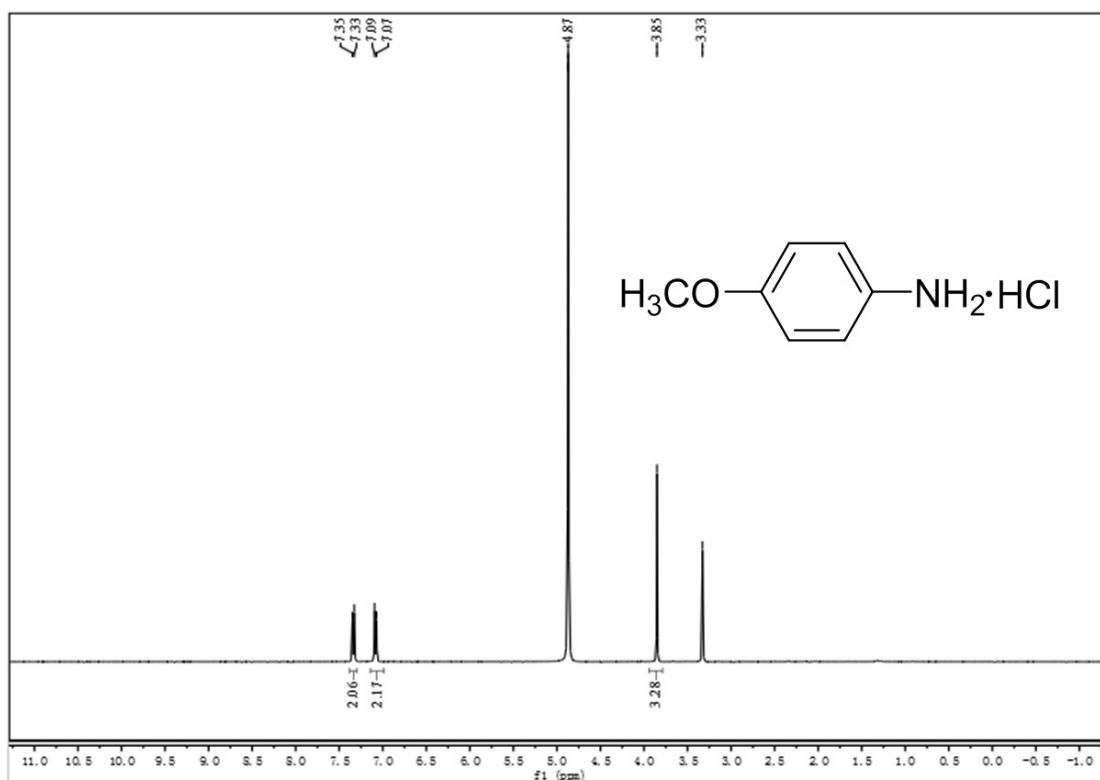

4-Amino-benzoic acid hydrochloride (Table 3, entry 9)

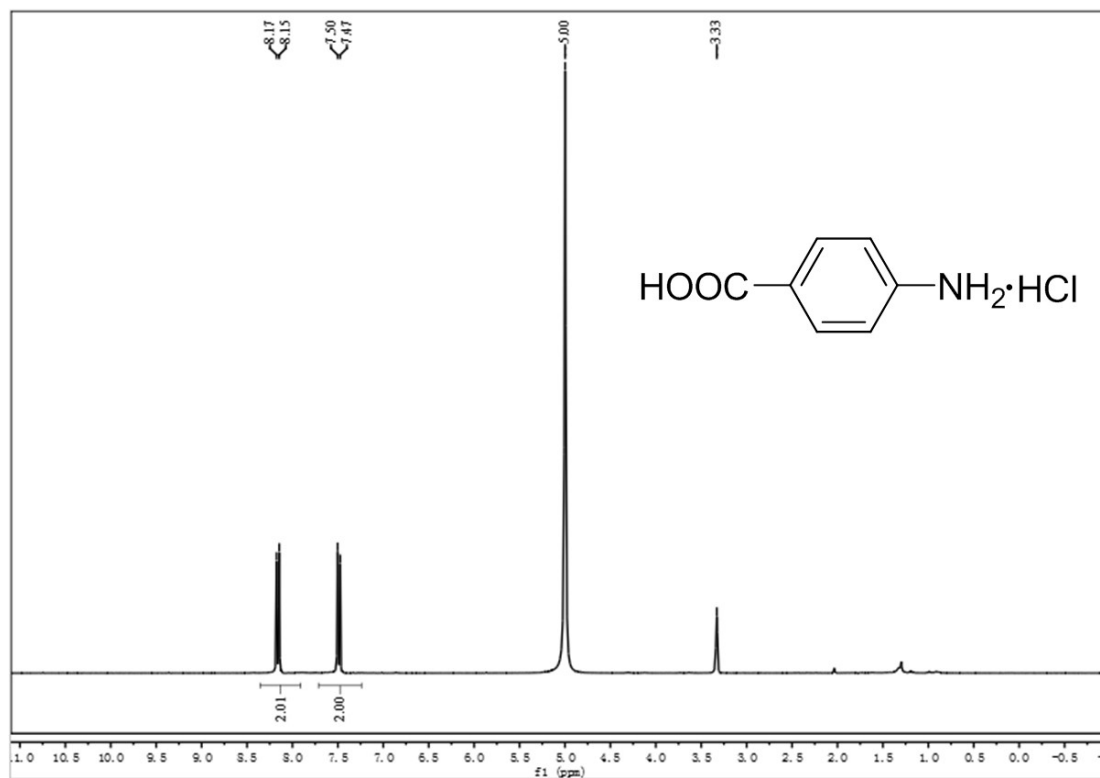

4-Aminobenzonitrile (Table 3, entry 10)

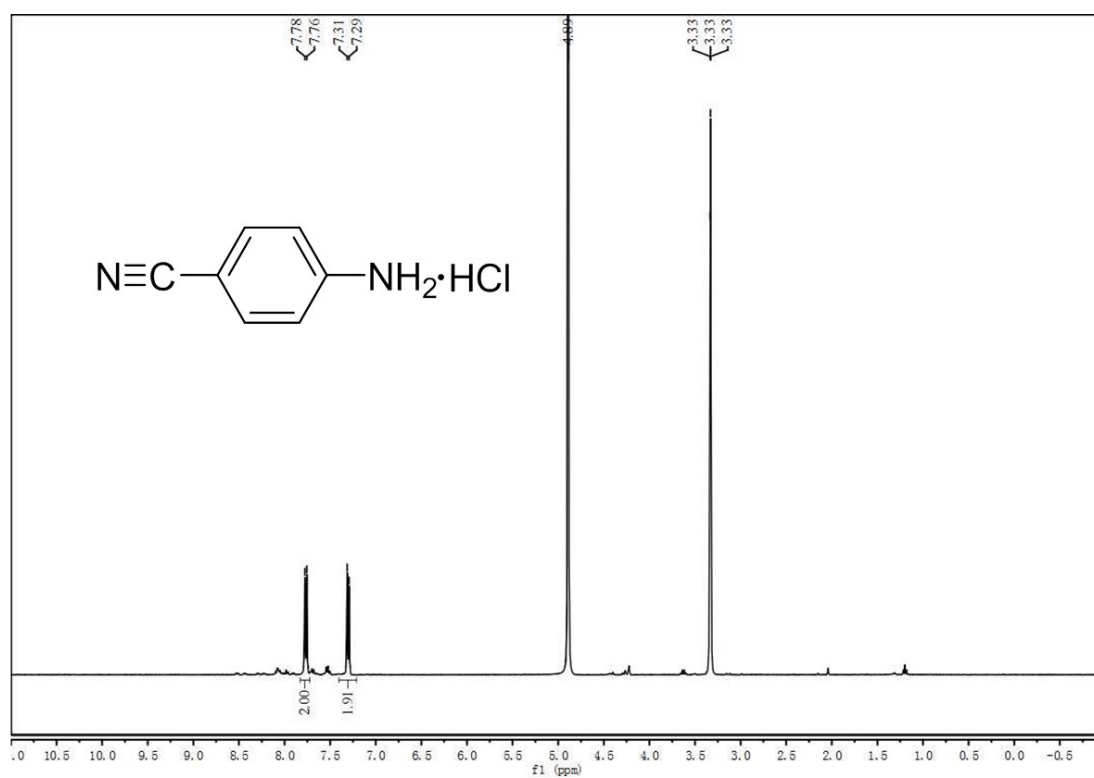

Supplement: c6gc00222f1.pdf [file c6gc00222f1.pdf]
